# Supplementary material
Source: PubMed Central journal article supplement (PMC8459303)

## Supplementary Online Content

Huber TS, Berceci SA, Scali ST, et al. Arteriovenous fistula maturation, functional patency, and intervention rates. *JAMA Surg*. Published online September 22, 2021. doi:10.1001/jamasurg.2021.4527

**eFigure 1 – Monthly Renal Replacement Status** - the monthly renal replacement status for all of the participants enrolled in the study is shown as broken down by their initial dialysis status.

**eFigure 2 – Functional Patency by Initial Dialysis Status** - Kaplan-Meier estimates comparing the functional patency for participants in the ESRD and CKD groups after successful AVF maturation showed no difference (log-rank,  $p = .7$ )

**eFigure 3 – Functional Patency by Assisted Maturation** - Kaplan-Meier estimates comparing the functional patency for participants with unassisted or assisted maturation.

**eFigure 4 – Participant Survival** – a Kaplan-Meier estimate, with the 95% CI, illustrating participant survival in the ESRD and CKD groups.

This supplementary material has been provided by the authors to give readers additional information about their work.

**eFigure 1 – Monthly Renal Replacement Status** - the monthly renal replacement status for all of the participants enrolled in the study is shown as broken down by their initial dialysis status.

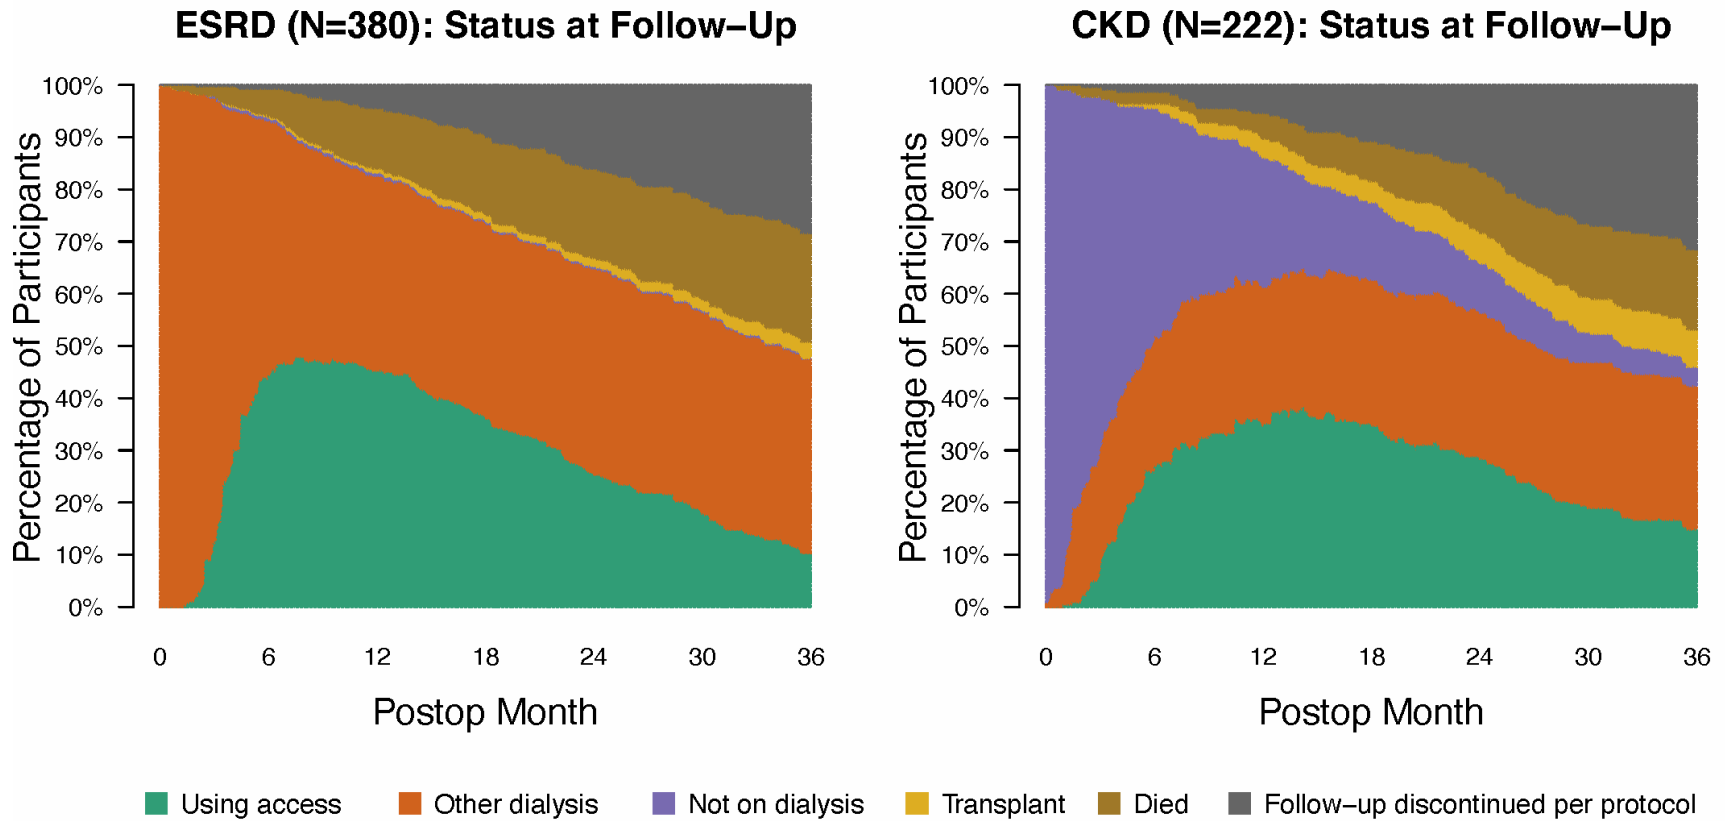

**eFigure 2 – Functional Patency by Initial Dialysis Status** - Kaplan-Meier estimates comparing the functional patency for participants in the ESRD and CKD groups after successful AVF maturation showed no difference (log-rank,  $p = .7$ )

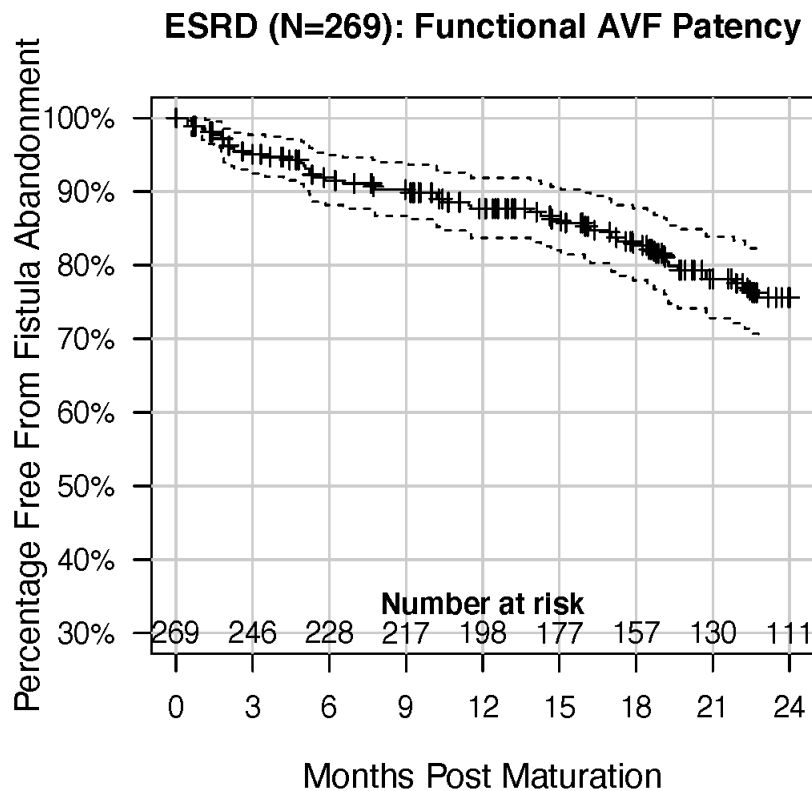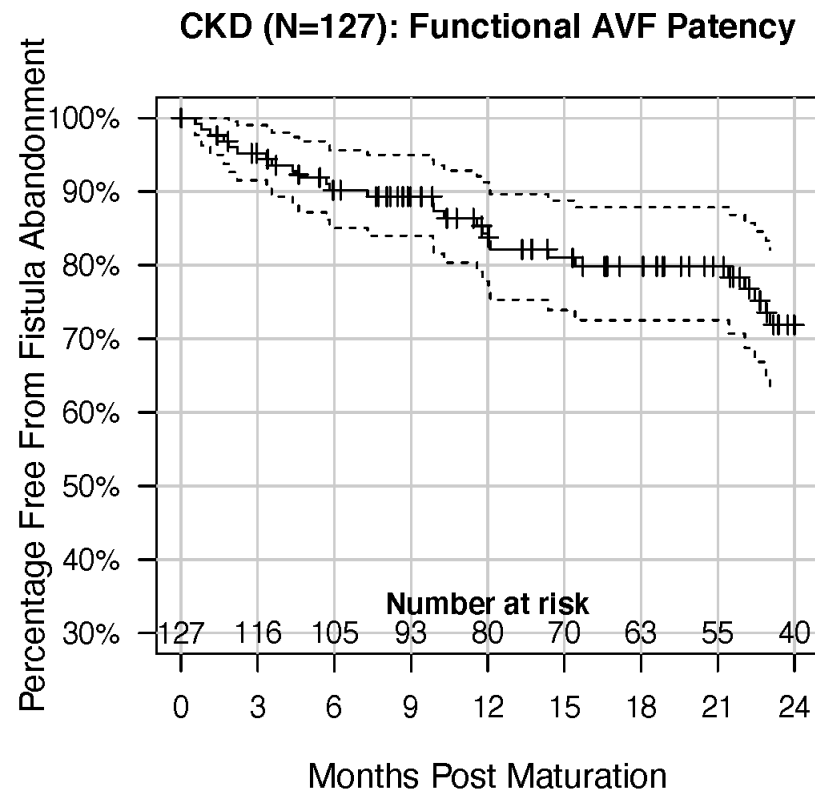

**eFigure 3 – Functional Patency by Assisted Maturation** - Kaplan-Meier estimates comparing the functional patency for participants with unassisted or assisted maturation.

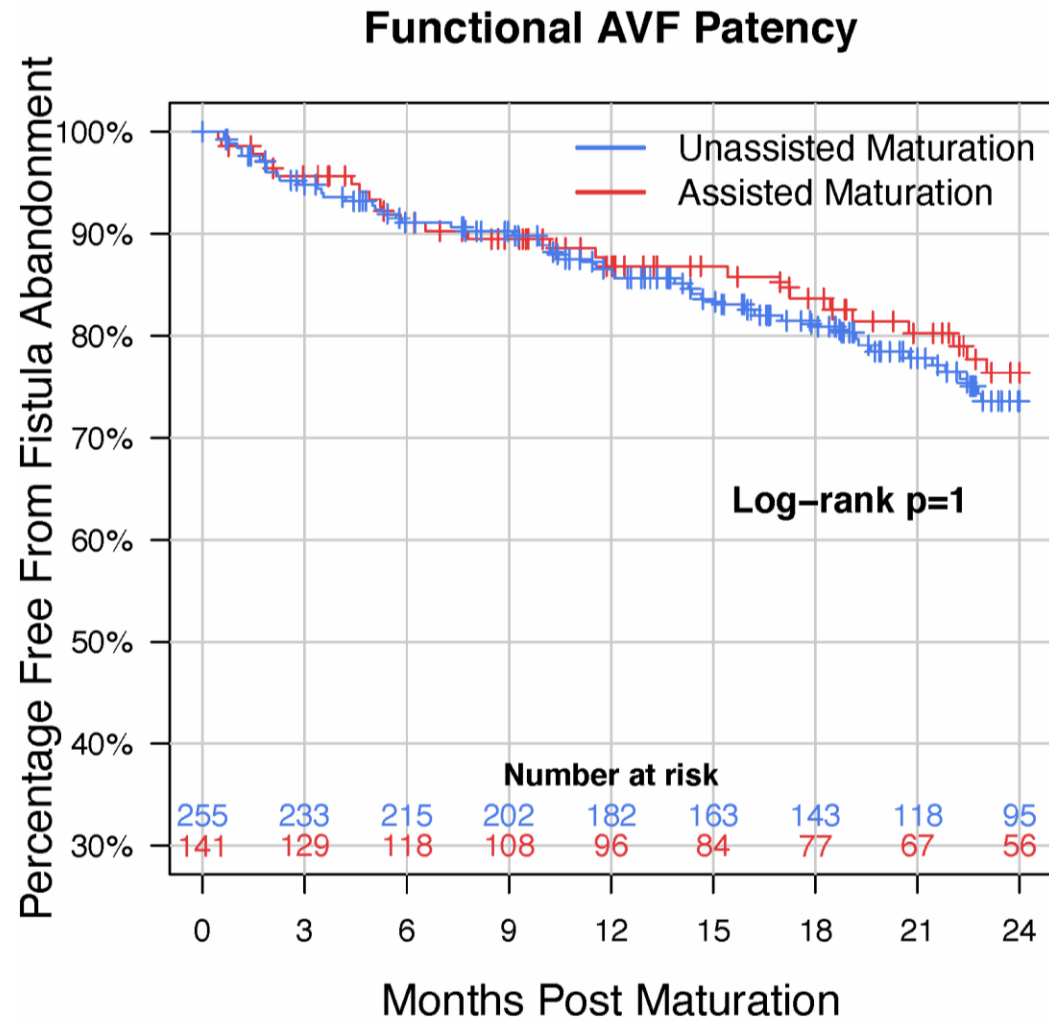

**eFigure 4 – Participant Survival** – a Kaplan-Meier estimate, with the 95% CI, illustrating participant survival in the ESRD and CKD groups.

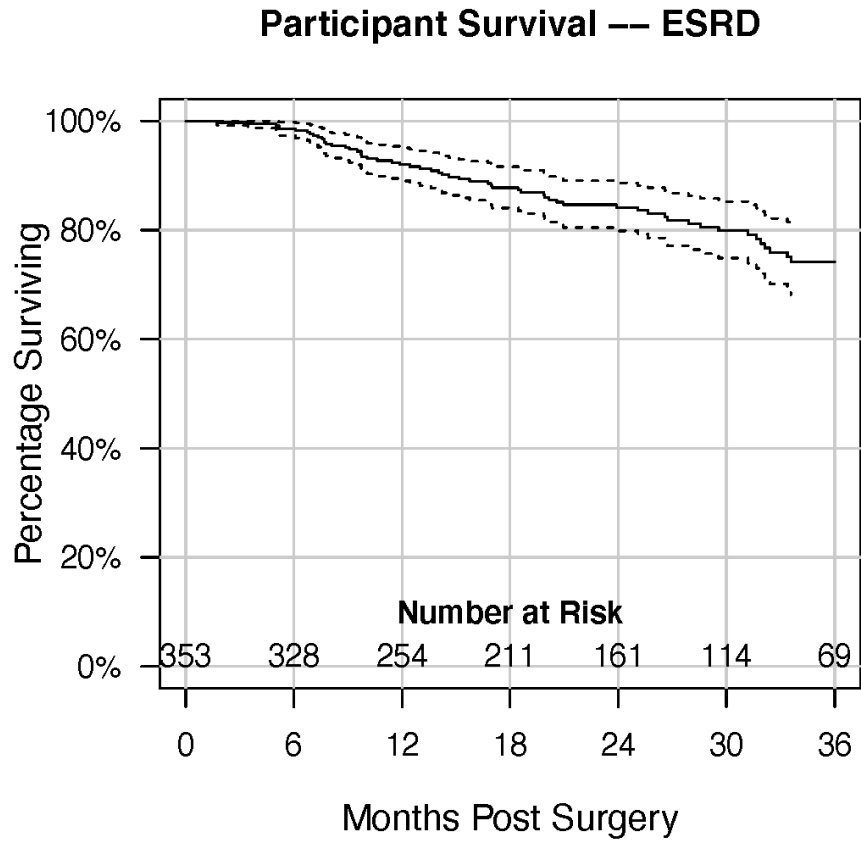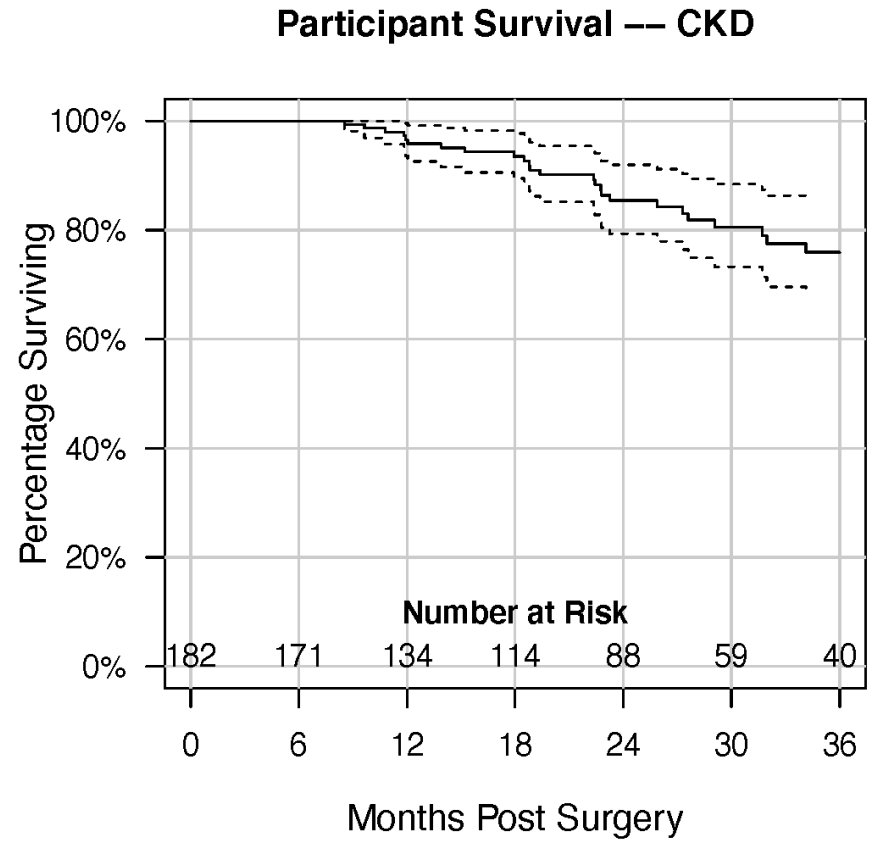

Supplement: jamasurg-e214527-s001.pdf [file jamasurg-e214527-s001.pdf]
